# Supplementary material
Source: publisher figshare collection journal article supplement (https://gsajournals.figshare.com/ndownloader/files/22169442)
Supplement: Supplementary file 1 [file 22169442]

## Sheet: Table S1
Table S1 List of the lines used in this study
Line	Population
M0001	IBM
M0003	IBM
M0005	IBM
M0007	IBM
M0008	IBM
M0010	IBM
M0011	IBM
M0012	IBM
M0013	IBM
M0014	IBM
M0015	IBM
M0016	IBM
M0017	IBM
M0018	IBM
M0019	IBM
M0021	IBM
M0022	IBM
M0023	IBM
M0024	IBM
M0025	IBM
M0026	IBM
M0027	IBM
M0028	IBM
M0029	IBM
M0030	IBM
M0031	IBM
M0032	IBM
M0033	IBM
M0034	IBM
M0035	IBM
M0036	IBM
M0038	IBM
M0039	IBM
M0040	IBM
M0041	IBM
M0042	IBM
M0043	IBM
M0044	IBM
M0045	IBM
M0046	IBM
M0047	IBM
M0048	IBM
M0051	IBM
M0052	IBM
M0054	IBM
M0055	IBM
M0056	IBM
M0057	IBM
M0058	IBM
M0059	IBM
M0060	IBM
M0061	IBM
M0062	IBM
M0063	IBM
M0066	IBM
M0067	IBM
M0068	IBM
M0071	IBM
M0074	IBM
M0075	IBM
M0076	IBM
M0077	IBM
M0079	IBM
M0080	IBM
M0081	IBM
M0082	IBM
M0083	IBM
M0085	IBM
M0086	IBM
M0087	IBM
M0088	IBM
M0090	IBM
M0091	IBM
M0092	IBM
M0093	IBM
M0096	IBM
M0097	IBM
M0098	IBM
M0099	IBM
M0101	IBM
M0105	IBM
M0106	IBM
M0109	IBM
M0110	IBM
M0111	IBM
M0113	IBM
M0114	IBM
M0116	IBM
M0118	IBM
M0119	IBM
M0120	IBM
M0121	IBM
M0123	IBM
M0124	IBM
M0125	IBM
M0126	IBM
M0127	IBM
M0128	IBM
M0129	IBM
M0130	IBM
M0131	IBM
M0132	IBM
M0133	IBM
M0134	IBM
M0136	IBM
M0138	IBM
M0141	IBM
M0142	IBM
M0143	IBM
M0145	IBM
M0146	IBM
M0150	IBM
M0151	IBM
M0152	IBM
M0153	IBM
M0154	IBM
M0156	IBM
M0157	IBM
M0159	IBM
M0160	IBM
M0161	IBM
M0162	IBM
M0163	IBM
M0164	IBM
M0165	IBM
M0167	IBM
M0168	IBM
M0170	IBM
M0171	IBM
M0172	IBM
M0176	IBM
M0177	IBM
M0178	IBM
M0180	IBM
M0181	IBM
M0182	IBM
M0183	IBM
M0184	IBM
M0185	IBM
M0186	IBM
M0187	IBM
M0188	IBM
M0189	IBM
M0190	IBM
M0191	IBM
M0192	IBM
M0194	IBM
M0195	IBM
M0196	IBM
M0197	IBM
M0198	IBM
M0199	IBM
M0200	IBM
M0201	IBM
M0204	IBM
M0205	IBM
M0206	IBM
M0208	IBM
M0209	IBM
M0210	IBM
M0213	IBM
M0214	IBM
M0215	IBM
M0216	IBM
M0218	IBM
M0219	IBM
M0220	IBM
M0222	IBM
M0223	IBM
M0225	IBM
M0228	IBM
M0229	IBM
M0230	IBM
M0232	IBM
M0233	IBM
M0237	IBM
M0238	IBM
M0240	IBM
M0241	IBM
M0244	IBM
M0246	IBM
M0248	IBM
M0250	IBM
M0253	IBM
M0255	IBM
M0256	IBM
M0258	IBM
M0262	IBM
M0263	IBM
M0265	IBM
M0266	IBM
M0267	IBM
M0268	IBM
M0269	IBM
M0270	IBM
M0271	IBM
M0272	IBM
M0274	IBM
M0276	IBM
M0277	IBM
M0278	IBM
M0279	IBM
M0280	IBM
M0281	IBM
M0282	IBM
M0283	IBM
M0284	IBM
M0285	IBM
M0286	IBM
M0287	IBM
M0288	IBM
M0289	IBM
M0292	IBM
M0295	IBM
M0297	IBM
M0298	IBM
M0300	IBM
M0303	IBM
M0304	IBM
M0305	IBM
M0307	IBM
M0308	IBM
M0309	IBM
M0310	IBM
M0311	IBM
M0313	IBM
M0314	IBM
M0315	IBM
M0317	IBM
M0318	IBM
M0321	IBM
M0322	IBM
M0323	IBM
M0325	IBM
M0326	IBM
M0327	IBM
M0328	IBM
M0331	IBM
M0332	IBM
M0334	IBM
M0335	IBM
M0337	IBM
M0338	IBM
M0340	IBM
M0341	IBM
M0342	IBM
M0344	IBM
M0345	IBM
M0346	IBM
M0347	IBM
M0349	IBM
M0351	IBM
M0352	IBM
M0353	IBM
M0354	IBM
M0355	IBM
M0356	IBM
M0357	IBM
M0358	IBM
M0360	IBM
M0361	IBM
M0362	IBM
M0364	IBM
M0365	IBM
M0367	IBM
M0368	IBM
M0369	IBM
M0372	IBM
M0376	IBM
M0378	IBM
M0379	IBM
M0380	IBM
M0381	IBM
M0382	IBM
M0383	IBM
M0384	IBM
Mo17	Parent of IBM population
B73	Parent of IBM population

## Sheet: TableS2
Table S2 Elemental profiles of B73 maize in the control and treatment. Results of ionomic analysis of B73 maize grown without fertilizer amendment (CT) or with the addition of 13.3g Osmocote per pot (TR); presented as mean content of each element (mg/kg), standard deviation (SD) and significance of the difference between the CT and TR (Sig). Rep I is the first repetition, Ret II is the second rep…
Rep I							Rep II
Element	Condition	Mean	SD	Sig			Element	Condition	Mean	SD	Sig
Al	CT	3.62515	0.999326	0.124			Al	CT	4.57	1.21	<0.00001
	TR	4.30305	1.82904					TR	10.5	28.8
As	CT	0.022027	0.0047728	<0.00001			As	CT	0.08	0.02	<0.00001
	TR	0.028177	0.0041348					TR	0.07	0.02
B	CT	9.27083	1.93503	<0.00001			B	CT	49.91	7.23	<0.00001
	TR	14.9885	3.0034					TR	61.44	7.22
Ca	CT	3668.22	446.185	<0.00001			Ca	CT	6832.32	1344	<0.00001
	TR	3130.62	405.118					TR	7163.03	1125.88
Cd	CT	0.008755	0.0017663	0.376			Cd	CT	0.07	0.01	<0.00001
	TR	0.009213	0.0018189					TR	0.08	0.02
Co	CT	0.002326	0.0014004	<0.00001			Co	CT	0.02	0.01	<0.00001
	TR	0.006397	0.0023526					TR	0.2	0.06
Cu	CT	14.1916	1.85023	0.524			Cu	CT	24.88	4.66	<0.00001
	TR	13.8763	1.57597					TR	26.65	2.46
Fe	CT	153.957	19.0606	<0.00001			Fe	CT	202.82	26.17	<0.00001
	TR	115.929	17.7247					TR	192.19	17.35
K	CT	21473	2024.06	<0.00001			K	CT	104019	9240	<0.00001
	TR	17836.9	2158.55					TR	97338.7	8933.15
Li	CT	343.249	90.1587	0.052			Li	CT	NA	NA	NA
	TR	294.001	83.6314					TR	NA	NA	NA
Mg	CT	2489.34	230.474	<0.00001			Mg	CT	4601	400	<0.00001
	TR	2094.05	161.999					TR	4466.87	306.39
Mn	CT	39.5085	4.95848	<0.00001			Mn	CT	72	15	<0.00001
	TR	46.8148	5.33445					TR	75.62	10.78
Mo	CT	0.221984	0.0241023	0.008			Mo	CT	0.53	0.05	<0.00001
	TR	0.202909	0.0234681					TR	0.49	0.08
Na	CT	50.5813	5.6521	0.846			Na	CT	50	7.23	<0.00001
	TR	50.1406	8.54362					TR	127.24	29.94
Ni	CT	0.524884	0.0979182	0.027			Ni	CT	0.61	0.15	<0.00001
	TR	0.467743	0.0753474					TR	1.26	0.52
P	CT	29792.5	3300.8	<0.00001			P	CT	17063	1118	<0.00001
	TR	34931.9	2929.1					TR	18021.7	1256.27
Rb	CT	37.8027	3.85923	<0.00001			Rb	CT	34.7	3.16	<0.00001
	TR	25.8191	5.36087					TR	31.03	2.84
S	CT	5606.43	1257.36	<0.00001			S	CT	11320	835	<0.00001
	TR	4077.47	385.521					TR	10496.1	689.06
Se	CT	0.045828	0.0334744	0.343			Se	CT	0.07	0.02	<0.00001
	TR	0.038384	0.0193914					TR	0.08	0.02
Sr	CT	5.75193	0.595141	<0.00001			Sr	CT	7.96	1.68	<0.00001
	TR	4.88678	0.63393					TR	8.27	1.46
Zn	CT	98.3238	9.32715	0.009			Zn	CT	155	39	<0.00001
	TR	105.004	5.10861					TR	148.67	14.6

## Sheet: TableS3
Table S3. Frequency of Ca-deficiency phenotype of B73 and Mo17 seedlings grown with different combinations of ammonium, nitrate, and calcium. The different amounts of Osmocote, NH4NO3, Ca(NO3)2 in each treatment solution are indicated, expressed as grams per liter as well as equivalent molar concentrations of ions of interest. Maize seedlings of lines B73 and Mo17 were assessed for presence of th…
Condition	Osmocote (g/L)	NH4NO3 (g/L)	Ca(NO3)2 (g/L)	NH4+ (mM)	NO3- (mM)	Ca2+ (mM)	notes	B73				Mo17
								Rep I		Rep II		Rep I		Rep II
								3d	6d	3d	6d	3d	6d	3d	6d
#1				0	0	0	just water control	0/5	0/5	0/5	0/5	0/5	0/5	0/5	0/5
#2	8g			56	51.2			0/5	0.8	0/5	0.8	0/5	0/5	0/5	0/5
#3	4g			28	25.6			0/5	5/5	0/5	0.8	0/5	0/5	0/5	0/5
#4	2g			14	12.8			0/5	0.6	0/5	0.6	0/5	0/5	0/5	0/5
#5	1g			7	6.4			0/5	0.4	0/5	0.2	0/5	0/5	0/5	0/5
#6	0.5g			3.5	3.2			0/5	0.4	0/5	0.2	0/5	0/5	0/5	0/5
#7		4		49.96	49.96	0		0.4	0.6	0.4	5/5	0/5	0/5	0/5	0/5
#8		2		24.98	24.98	0		0.4	0.6	0.4	5/5	0/5	0/5	0/5	0/5
#9		1		12.49	12.49	0		0.2	0.4	0.2	0.6	0/5	0/5	0/5	0/5
#10		0.5		6.245	6.245	0		0.2	0.4	0.4	0.6	0/5	0/5	0/5	0/5
#11		0.25		3.1225	3.1225	0		0.2	0.4	0.2	0.4	0/5	0/5	0/5	0/5
#12			4.102	0	50	25	equivalent NO3 to 4g/L NH4NO3	0/5	0/5	0/5	0.2	0/5	0/5	0/5	0/5
#13			2.06	0	25	12.5	equivalent NO3 to 2g/L NH4NO3	0/5	0/5	0/5	0/5	0/5	0/5	0/5	0/5
#14			1.03	0	12.5	6.3	equivalent NO3 to 1g/L NH4NO3	0/5	0/5	0/5	0/5	0/5	0/5	0/5	0/5
#15			0.52	0	6.25	3.1	equivalent NO3 to 0.5g/L NH4NO3	0/5	0/5	0/5	0/5	0/5	0/5	0/5	0/5
#16			0.26	0	3.125	1.6	equivalent NO3 to 0.25g/L NH4NO3	0/5	0/5	0/5	0/5	0/5	0/5	0/5	0/5
#17		2	2.06	24.98	49.98	12.5	equivalent NO3 to 4g/L NH4NO3	0/5	0/5	0/5	0.2	0/5	0/5	0/5	0/5
#18		1	1.03	12.49	24.99	6.3	equivalent NO3 to 2g/L NH4NO3	0/5	0.2	0/5	0.2	0/5	0/5	0/5	0/5
#19		0.5	0.52	6.245	12.495	3.1	equivalent NO3 to 1g/L NH4NO3	0/5	0.2	0/5	0.2	0/5	0/5	0/5	0/5
#20		0.25	0.26	3.1225	6.2475	1.6	equivalent NO3 to 0.5g/L NH4NO3	0/5	0.2	0/5	0/5	0/5	0/5	0/5	0/5

## Sheet: Table S4
Table S4 The Ca deficiency phenotype of 276 RIL population in Greenhouse. "Rep" is the replication. Rep1.1, Rep1.2, Rep1.3, Rep1.4, Rep 1.5, Rep 1.6, Rep 1.7 represent the phenotype on November 26, 28, 30, December 3, 5, 7, 10 of first replication expressed as the proportion of plants showing the Ca-deficiency phenotype. Rep2.1, Rep2.2, Rep2.3, Rep2.4 represent the phenotype on January 7, 9, 11, …
Line	IBM#	Rep	Rep1.1	Rep1.2	Rep1.3	Rep1.4	Rep1.5	Rep1.6	Rep1.7	WA1		Line	IBM#	Rep	Rep2.1	Rep2.2	Rep2.3	Rep2.4	WA2	LSMEAN
M0001	IBM001	1	1	1	1	1	1	1	1	1		M0001	IBM001	2	0.8	1	1	1	0.971429	0.985226
M0003	IBM003	1	0	0	0.33	0.33	0.67	1	1	0.5		M0003	IBM003	2	0.4	0.6	0.8	0.8	0.685714	0.595226
M0005	IBM005	1	0	0	0	0	0.2	0.4	1	0.207143		M0005	IBM005	2	0	0.2	0.6	0.6	0.4	0.305226
M0007	IBM007	1	1	1	1	1	1	0.67	1	0.940476		M0007	IBM007	2	0.4	0.4	0.4	0.6	0.442857	0.690226
M0008	IBM008	1	0	0	0	0	0	0.33	0.33	0.0952381		M0008	IBM008	2	0	0	0	0.4	0.0857143	0.0952258
M0010	IBM010	1	1	1	1	1	1	1	1	1		M0010	IBM010	2	1	1	1	1	1	1.00023
M0011	IBM011	1	0	0.25	0.5	0.75	0.75	1	1	0.651786		M0011	IBM011	2	0	0	0	0.25	0.0535714	0.350226
M0012	IBM012	1	0	0.25	0.5	0.5	1	1	1	0.642857		M0012	IBM012	2	0.67	0.67	1	1	0.857143	0.750226
M0013	IBM013	1	0	0.5	0.5	0.5	0.5	1	1	0.607143		M0013	IBM013	2	0	0	0	0	0	0.305226
M0014	IBM014	1	1	1	1	1	1	1	1	1		M0014	IBM014	2	0.6	0.8	0.8	0.8	0.771429	0.885226
M0015	IBM015	1	0.75	1	1	1	1	1	1	0.982143		M0015	IBM015	2	0	0	0.2	0.2	0.114286	0.545226
M0016	IBM016	1	0.5	0.5	0.5	0.5	1	1	1	0.714286		M0016	IBM016	2	0.5	1	1	1	0.928571	0.820226
M0017	IBM017	1	0.33	0.33	0.33	0.33	0.33	0.33	0.33	0.33		M0017	IBM017	2	0.4	0.6	0.6	0.6	0.571429	0.450226
M0018	IBM018	1	0	0.5	0.75	0.75	1	1	1	0.767857		M0018	IBM018	2	0.5	1	1	1	0.928571	0.850226
M0019	IBM019	1	NA	NA	NA	NA	NA	NA	NA	NA		M0019	IBM019	2	0.2	0.4	0.4	0.6	0.414286	0.434206
M0021	IBM021	1	0.5	1	1	1	1	1	1	0.964286		M0021	IBM021	2	0.6	0.6	0.6	1	0.685714	0.825226
M0022	IBM022	1	0	0	0	1	1	1	1	0.607143		M0022	IBM022	2	0.2	0.2	0.4	0.6	0.357143	0.485226
M0023	IBM023	1	0	0	0	0	1	1	1	0.428571		M0023	IBM023	2	0	0	0	0	0	0.215226
M0024	IBM024	1	0.25	0.25	0.25	0.5	0.5	0.75	0.75	0.473214		M0024	IBM024	2	0	0	0.2	0.2	0.114286	0.290226
M0025	IBM025	1	1	1	1	1	1	1	1	1		M0025	IBM025	2	0.8	1	1	1	0.971429	0.985226
M0026	IBM026	1	0	0	0	0.25	0.25	1	1	0.366071		M0026	IBM026	2	0	0	0.2	0.6	0.2	0.285226
M0027	IBM027	1	0.6	0.6	0.8	0.8	1	1	1	0.842857		M0027	IBM027	2	0.4	0.4	0.6	0.8	0.557143	0.700226
M0028	IBM028	1	0.4	0.8	0.8	0.8	0.8	0.8	0.8	0.771429		M0028	IBM028	2	0	0.4	0.6	0.6	0.457143	0.615226
M0029	IBM029	1	0	0	0.2	0.2	0.4	0.8	1	0.378571		M0029	IBM029	2	0	0	0	0.5	0.107143	0.245226
M0030	IBM030	1	0	0	0	0	0	0.5	0.5	0.142857		M0030	IBM030	2	0	0	0	0	0	0.0702258
M0031	IBM031	1	0.25	1	1	1	1	1	1	0.946429		M0031	IBM031	2	0	0	0	0	0	0.475226
M0032	IBM032	1	0	0	0	0	0	0.25	0.5	0.0982143		M0032	IBM032	2	0	0	0	0	0	0.0502258
M0033	IBM033	1	0.67	1	1	1	1	1	1	0.97619		M0033	IBM033	2	0.4	0.4	0.8	1	0.671429	0.825226
M0034	IBM034	1	0	0	0	0	1	1	1	0.428571		M0034	IBM034	2	NA	NA	NA	NA	NA	0.406245
M0035	IBM035	1	0	0	0.4	0.4	0.8	0.8	1	0.507143		M0035	IBM035	2	0.4	0.6	0.6	0.6	0.571429	0.540226
M0036	IBM036	1	0	0.2	0.4	0.8	0.8	0.8	0.8	0.585714		M0036	IBM036	2	0	0	0.5	0.75	0.339286	0.465226
M0038	IBM038	1	0	0	0	0.33	0.67	0.67	0.67	0.345238		M0038	IBM038	2	0	0	0	1	0.214286	0.280226
M0039	IBM039	1	1	1	1	1	1	1	1	1		M0039	IBM039	2	0	0.6	0.8	0.8	0.628571	0.815226
M0040	IBM040	1	0.75	0.75	1	1	1	1	1	0.946429		M0040	IBM040	2	0	0.4	0.8	1	0.614286	0.780226
M0041	IBM041	1	0.5	1	1	1	1	1	1	0.964286		M0041	IBM041	2	0	1	1	1	0.857143	0.910226
M0042	IBM042	1	0	0	0.25	0.25	0.25	0.75	0.75	0.339286		M0042	IBM042	2	0	0	0.2	0.2	0.114286	0.225226
M0043	IBM043	1	0	0.2	0.2	0.2	0.4	0.4	0.6	0.292857		M0043	IBM043	2	0.2	0.2	0.2	0.2	0.2	0.245226
M0044	IBM044	1	0	0.25	0.5	0.5	0.75	1	1	0.607143		M0044	IBM044	2	0	0.33	0.67	0.67	0.47619	0.545226
M0045	IBM045	1	NA	NA	NA	NA	NA	NA	NA	NA		M0045	IBM045	2	0	0	0	0	0	0.0242062
M0046	IBM046	1	0.4	0.6	1	1	1	1	1	0.9		M0046	IBM046	2	1	1	1	1	1	0.950226
M0047	IBM047	1	0	0	1	1	1	1	1	0.785714		M0047	IBM047	2	0	0	0.5	1	0.392857	0.590226
M0048	IBM048	1	0	0	0	0.25	0.25	0.75	1	0.321429		M0048	IBM048	2	0	0	0	0	0	0.160226
M0051	IBM051	1	0.33	0.33	0.67	0.67	0.67	1	1	0.690476		M0051	IBM051	2	0	0	1	1	0.571429	0.630226
M0052	IBM052	1	0.5	0.5	1	1	1	1	1	0.892857		M0052	IBM052	2	1	1	1	1	1	0.945226
M0054	IBM054	1	0.25	0.25	0.25	0.25	0.25	0.5	0.75	0.348214		M0054	IBM054	2	0.4	0.4	0.4	0.4	0.4	0.375226
M0055	IBM055	1	0	0.5	0.5	0.75	0.75	0.75	0.75	0.616071		M0055	IBM055	2	0	0	0	0	0	0.310226
M0056	IBM056	1	0	0	0	0	0	0	0.25	0.0267857		M0056	IBM056	2	0	0	0	0	0	0.0152258
M0057	IBM057	1	0	0.2	0.2	0.2	0.4	0.4	0.4	0.271429		M0057	IBM057	2	0	0	0	0.2	0.0428571	0.155226
M0058	IBM058	1	0.25	0.25	0.5	0.5	0.5	0.5	0.75	0.473214		M0058	IBM058	2	0	0	0	0	0	0.235226
M0059	IBM059	1	0	0.25	0.25	0.25	0.25	0.25	0.25	0.232143		M0059	IBM059	2	0.2	0.8	0.8	0.8	0.714286	0.470226
M0060	IBM060	1	0	0.33	0.33	0.33	0.33	1	1	0.5		M0060	IBM060	2	0	0	0.33	0.33	0.190476	0.345226
M0061	IBM061	1	0.2	0.6	0.8	0.8	1	1	1	0.814286		M0061	IBM061	2	0.4	0.6	0.6	0.8	0.614286	0.710226
M0062	IBM062	1	0.33	0.67	1	1	1	1	1	0.904762		M0062	IBM062	2	0.67	0.67	0.67	1	0.738095	0.820226
M0063	IBM063	1	1	1	1	1	1	1	1	1		M0063	IBM063	2	1	1	1	1	1	1.00023
M0066	IBM066	1	0.33	0.67	1	1	1	1	1	0.904762		M0066	IBM066	2	0.33	0.33	0.67	1	0.595238	0.750226
M0067	IBM067	1	0	0	0	0	0	0.4	0.4	0.114286		M0067	IBM067	2	0	0	0	0	0	0.0552258
M0068	IBM068	1	0.6	0.6	0.6	0.6	0.6	0.8	0.8	0.657143		M0068	IBM068	2	0.4	0.4	0.4	0.4	0.4	0.530226
M0071	IBM071	1	0	0.33	0.67	0.67	0.67	0.67	0.67	0.571429		M0071	IBM071	2	0	0	0	0.5	0.107143	0.340226
M0074	IBM074	1	0.25	1	1	1	1	1	1	0.946429		M0074	IBM074	2	0.2	0.6	0.6	0.6	0.542857	0.745226
M0075	IBM075	1	0	0.25	0.5	0.5	0.75	1	1	0.607143		M0075	IBM075	2	0	0.2	0.2	0.4	0.214286	0.410226
M0076	IBM076	1	0	0	0	0	0	0	0	0		M0076	IBM076	2	0	0	0	0	0	0.000225804
M0077	IBM077	1	0	0	0	0	0.5	0.5	0.75	0.241071		M0077	IBM077	2	0	0	0	0	0	0.120226
M0079	IBM079	1	0.25	0.5	0.75	0.75	0.75	0.75	1	0.705357		M0079	IBM079	2	0.4	0.6	0.6	0.8	0.614286	0.660226
M0080	IBM080	1	0.25	0.25	0.25	0.25	0.5	1	1	0.5		M0080	IBM080	2	0	0.2	0.2	0.2	0.171429	0.335226
M0081	IBM081	1	0	0	0	0	0	0.4	0.6	0.135714		M0081	IBM081	2	0	0	0	0	0	0.0702258
M0082	IBM082	1	0.5	1	1	1	1	1	1	0.964286		M0082	IBM082	2	0.4	1	1	1	0.914286	0.935226
M0083	IBM083	1	0.6	1	1	1	1	1	1	0.971429		M0083	IBM083	2	0.67	1	1	1	0.952381	0.960226
M0085	IBM085	1	0	0	0	1	1	1	1	0.607143		M0085	IBM085	2	0.5	0.5	0.5	1	0.607143	0.610226
M0086	IBM086	1	0	0.33	0.67	0.67	1	1	1	0.714286		M0086	IBM086	2	NA	NA	NA	NA	NA	0.686245
M0087	IBM087	1	0.5	0.5	0.5	0.5	0.5	0.5	0.5	0.5		M0087	IBM087	2	0	0	0.25	0.25	0.142857	0.320226
M0088	IBM088	1	0	0	0	1	1	1	1	0.607143		M0088	IBM088	2	0	0	1	1	0.571429	0.590226
M0090	IBM090	1	0	0.8	1	1	1	1	1	0.9		M0090	IBM090	2	0.5	0.75	0.75	1	0.767857	0.835226
M0091	IBM091	1	0	0.5	0.5	1	1	1	1	0.767857		M0091	IBM091	2	0.33	0.33	1	1	0.714286	0.740226
M0092	IBM092	1	0.33	0.33	0.33	0.67	1	1	1	0.678571		M0092	IBM092	2	0.6	0.6	0.8	0.8	0.714286	0.695226
M0093	IBM093	1	0	0	0.2	0.2	0.4	1	1	0.414286		M0093	IBM093	2	0	0.25	0.5	0.5	0.357143	0.385226
M0096	IBM096	1	0	0	0	0.5	0.5	1	1	0.446429		M0096	IBM096	2	0.25	0.25	0.25	0.25	0.25	0.350226
M0097	IBM097	1	0	0	0	1	1	1	1	0.607143		M0097	IBM097	2	0.5	0.5	0.5	1	0.607143	0.610226
M0098	IBM098	1	0	0.5	0.75	1	1	1	1	0.8125		M0098	IBM098	2	0.5	0.5	1	1	0.785714	0.800226
M0099	IBM099	1	0.4	0.4	0.6	0.6	0.6	0.8	0.8	0.614286		M0099	IBM099	2	0.5	0.5	0.5	0.5	0.5	0.555226
M0101	IBM101	1	0	0	0.8	0.8	0.8	1	1	0.685714		M0101	IBM101	2	0.6	1	1	1	0.942857	0.815226
M0105	IBM105	1	0	0.67	0.67	1	1	1	1	0.821429		M0105	IBM105	2	0.33	0.33	0.67	0.67	0.52381	0.670226
M0106	IBM106	1	0.33	1	1	1	1	1	1	0.952381		M0106	IBM106	2	0.67	1	1	1	0.952381	0.950226
M0109	IBM109	1	0.25	0.25	0.25	0.25	0.25	0.25	0.25	0.25		M0109	IBM109	2	0	0	0.25	0.25	0.142857	0.195226
M0110	IBM110	1	0	0	0	0.2	0.4	0.8	0.8	0.321429		M0110	IBM110	2	0	0.4	0.4	0.8	0.428571	0.375226
M0111	IBM111	1	0	0.67	0.67	0.67	1	1	1	0.761905		M0111	IBM111	2	0.4	0.8	0.8	1	0.785714	0.775226
M0113	IBM113	1	NA	NA	NA	NA	NA	NA	NA	NA		M0113	IBM113	2	0	0	1	1	0.571429	0.594206
M0114	IBM114	1	1	1	0.75	1	1	1	1	0.955357		M0114	IBM114	2	0.6	0.6	0.6	0.8	0.642857	0.800226
M0116	IBM116	1	0	0	0	0.33	1	1	1	0.488095		M0116	IBM116	2	0	0.2	0.4	0.8	0.371429	0.430226
M0118	IBM118	1	0	0.4	0.6	0.8	1	1	1	0.735714		M0118	IBM118	2	0.2	0.2	0.2	0.4	0.242857	0.490226
M0119	IBM119	1	1	1	1	1	1	1	1	1		M0119	IBM119	2	0.6	0.8	0.8	1	0.814286	0.905226
M0120	IBM120	1	1	1	1	1	1	1	1	1		M0120	IBM120	2	0.2	0.8	0.8	0.8	0.714286	0.855226
M0121	IBM121	1	0	0	0	0	0	0.33	0.33	0.0952381		M0121	IBM121	2	0	0	0	0	0	0.0502258
M0123	IBM123	1	0	0.33	0.67	0.67	1	1	1	0.714286		M0123	IBM123	2	0	0.8	1	1	0.8	0.755226
M0124	IBM124	1	0	0.33	0.67	0.67	1	1	1	0.714286		M0124	IBM124	2	0.5	1	1	1	0.928571	0.820226
M0125	IBM125	1	0	0	0.6	0.6	0.8	0.8	0.8	0.557143		M0125	IBM125	2	0	0.25	0.25	0.75	0.321429	0.440226
M0126	IBM126	1	0	0.33	0.33	0.33	0.67	1	1	0.547619		M0126	IBM126	2	0	0.4	0.8	0.8	0.571429	0.560226
M0127	IBM127	1	0	0.2	0.6	0.6	0.8	0.8	0.8	0.585714		M0127	IBM127	2	0.5	0.75	1	1	0.857143	0.725226
M0128	IBM128	1	0	0.2	0.4	0.4	1	1	1	0.6		M0128	IBM128	2	0.33	0.33	0.67	0.5	0.488095	0.545226
M0129	IBM129	1	0	0	0	0	0	1	1	0.285714		M0129	IBM129	2	NA	NA	NA	NA	NA	0.266245
M0130	IBM130	1	0	0	0	0	0	1	1	0.285714		M0130	IBM130	2	NA	NA	NA	NA	NA	0.266245
M0131	IBM131	1	0	0	0.4	0.4	0.6	1	1	0.514286		M0131	IBM131	2	0.6	0.6	0.8	0.8	0.714286	0.610226
M0132	IBM132	1	0	0	0	0	1	1	1	0.428571		M0132	IBM132	2	0	0.67	0.67	1	0.642857	0.535226
M0133	IBM133	1	0	0	0	0	0	0.5	0.5	0.142857		M0133	IBM133	2	NA	NA	NA	NA	NA	0.116245
M0134	IBM134	1	0	0	0	0	0	0	0	0		M0134	IBM134	2	0.2	0.2	0.2	0.2	0.2	0.100226
M0136	IBM136	1	NA	NA	NA	NA	NA	NA	NA	NA		M0136	IBM136	2	0	0	0.33	0.67	0.261905	0.284206
M0138	IBM138	1	0.33	0.33	0.33	0.67	1	1	1	0.678571		M0138	IBM138	2	1	1	1	1	1	0.840226
M0141	IBM141	1	0	0	0	0.2	0.2	0.4	0.8	0.221429		M0141	IBM141	2	0	0	1	1	0.571429	0.395226
M0142	IBM142	1	NA	NA	NA	NA	NA	NA	NA	NA		M0142	IBM142	2	1	1	1	0.33	0.857143	0.884206
M0143	IBM143	1	0	0	0.33	0.33	0.67	1	1	0.5		M0143	IBM143	2	0.5	0.5	0.5	0.5	0.5	0.500226
M0145	IBM145	1	0.33	0.33	1	1	1	1	1	0.857143		M0145	IBM145	2	0	0.5	1	1	0.714286	0.785226
M0146	IBM146	1	0.33	0.33	0.33	0.33	0.33	0.67	1	0.464286		M0146	IBM146	2	0.6	1	1	1	0.942857	0.700226
M0150	IBM150	1	0.4	0.8	1	1	1	1	1	0.928571		M0150	IBM150	2	1	1	1	1	1	0.965226
M0151	IBM151	1	0.25	0.5	1	1	1	1	1	0.875		M0151	IBM151	2	0.75	0.75	0.75	1	0.803571	0.840226
M0152	IBM152	1	0	0	0	0	0	0.2	0.2	0.0571429		M0152	IBM152	2	0	0	0	0	0	0.0302258
M0153	IBM153	1	0.25	1	1	1	1	1	1	0.946429		M0153	IBM153	2	1	1	1	1	1	0.975226
M0154	IBM154	1	0	0.4	0.4	0.4	0.6	0.6	0.8	0.478571		M0154	IBM154	2	0	0.2	0.8	0.8	0.514286	0.495226
M0156	IBM156	1	0	1	1	1	1	1	1	0.928571		M0156	IBM156	2	0.5	0.5	1	1	0.785714	0.860226
M0157	IBM157	1	0	0.5	1	1	1	1	1	0.857143		M0157	IBM157	2	0.6	0.6	1	1	0.828571	0.845226
M0159	IBM159	1	0	0	1	1	1	1	1	0.785714		M0159	IBM159	2	1	1	1	1	1	0.895226
M0160	IBM160	1	0	0	0	0	0.5	1	1	0.357143		M0160	IBM160	2	1	1	1	1	1	0.680226
M0161	IBM161	1	0	0	0	0	0	0	0	0		M0161	IBM161	2	0	0	0	0	0	0.000225804
M0162	IBM162	1	0	0	0.5	0.5	0.5	0.5	0.5	0.392857		M0162	IBM162	2	0.67	0.67	0.67	0.67	0.67	0.530226
M0163	IBM163	1	0	0	1	1	1	1	1	0.785714		M0163	IBM163	2	0.25	0.4	0.8	0.8	0.607143	0.700226
M0164	IBM164	1	0	0	0	0	1	1	1	0.428571		M0164	IBM164	2	1	1	1	1	1	0.715226
M0165	IBM165	1	0	0.5	0.5	0.5	0.75	0.75	0.75	0.571429		M0165	IBM165	2	0.8	0.8	0.8	0.8	0.8	0.685226
M0167	IBM167	1	0	0.25	0.75	1	1	1	1	0.776786		M0167	IBM167	2	0	0.33	0.33	1	0.428571	0.605226
M0168	IBM168	1	0	0	0.75	0.75	0.75	0.75	0.75	0.589286		M0168	IBM168	2	0.33	0.67	0.67	0.67	0.619048	0.605226
M0170	IBM170	1	NA	NA	NA	NA	NA	NA	NA	NA		M0170	IBM170	2	0	0	1	1	0.571429	0.594206
M0171	IBM171	1	0	0	0.25	1	1	1	1	0.651786		M0171	IBM171	2	0.2	0.4	0.4	0.4	0.371429	0.510226
M0172	IBM172	1	0	0	0	0	0	0	0	0		M0172	IBM172	2	0	0	0	0	0	0.000225804
M0176	IBM176	1	1	1	1	1	1	1	1	1		M0176	IBM176	2	1	1	1	1	1	1.00023
M0177	IBM177	1	0	0.4	0.4	0.4	0.4	0.8	0.8	0.485714		M0177	IBM177	2	0.6	0.4	0.4	0.4	0.428571	0.460226
M0178	IBM178	1	0	0.2	0.2	0.2	0.4	1	1	0.442857		M0178	IBM178	2	0.4	0.4	0.4	0.4	0.4	0.420226
M0180	IBM180	1	0.2	0.2	0.6	1	1	1	1	0.757143		M0180	IBM180	2	0.75	0.75	0.75	0.75	0.75	0.755226
M0181	IBM181	1	0.25	0.25	0.2	0.8	1	1	1	0.660714		M0181	IBM181	2	0.2	0.2	0.2	0.4	0.242857	0.450226
M0182	IBM182	1	0.33	0.33	1	1	1	1	1	0.857143		M0182	IBM182	2	0.25	0.5	1	1	0.75	0.805226
M0183	IBM183	1	0.75	1	1	1	1	1	1	0.982143		M0183	IBM183	2	0.75	1	1	1	0.964286	0.970226
M0184	IBM184	1	0.25	0.25	0.25	0.25	0.5	0.5	0.5	0.357143		M0184	IBM184	2	0.67	0.67	1	1	0.857143	0.610226
M0185	IBM185	1	0	0	0	0	0	0	0	0		M0185	IBM185	2	0.33	0.33	0.33	0.33	0.33	0.165226
M0186	IBM186	1	0	0	0	0	0	0	0	0		M0186	IBM186	2	0	0	0	0	0	0.000225804
M0187	IBM187	1	0	0.33	1	1	1	1	1	0.833333		M0187	IBM187	2	0	1	1	1	0.857143	0.845226
M0188	IBM188	1	0	0	0.2	0.2	0.2	0.2	0.2	0.157143		M0188	IBM188	2	0.4	0.8	0.8	0.8	0.742857	0.450226
M0189	IBM189	1	0.8	0.8	0.8	0.8	0.8	0.8	0.8	0.8		M0189	IBM189	2	0.6	0.8	1	1	0.885714	0.845226
M0190	IBM190	1	0.2	0.4	0.4	0.4	0.8	0.8	0.8	0.557143		M0190	IBM190	2	0.8	0.8	1	1	0.914286	0.735226
M0191	IBM191	1	0.2	0.2	0.2	0.2	0.4	0.4	0.6	0.307143		M0191	IBM191	2	0.4	0.4	0.6	0.6	0.514286	0.410226
M0192	IBM192	1	0	0.5	0.75	0.75	0.75	0.75	0.75	0.660714		M0192	IBM192	2	0.6	1	1	1	0.942857	0.800226
M0194	IBM194	1	0	0	0.5	0.5	0.5	1	1	0.535714		M0194	IBM194	2	0.5	0.5	0.5	1	0.607143	0.575226
M0195	IBM195	1	0.4	0.8	0.8	0.8	1	1	1	0.857143		M0195	IBM195	2	0.75	0.75	0.75	1	0.803571	0.830226
M0196	IBM196	1	0.2	0.6	0.6	0.6	0.6	1	1	0.685714		M0196	IBM196	2	0.75	1	1	1	0.964286	0.825226
M0197	IBM197	1	0.2	0.6	0.6	0.6	0.6	1	1	0.685714		M0197	IBM197	2	0	0.33	0.67	1	0.547619	0.620226
M0198	IBM198	1	0	0	0	1	1	1	1	0.607143		M0198	IBM198	2	NA	NA	NA	NA	NA	0.586245
M0199	IBM199	1	0.5	1	1	1	1	1	1	0.964286		M0199	IBM199	2	0.6	1	1	1	0.942857	0.950226
M0200	IBM200	1	0	0	0.33	0.33	0.67	1	1	0.5		M0200	IBM200	2	0	0	0.4	0.4	0.228571	0.365226
M0201	IBM201	1	0	0.25	0.25	0.5	1	1	1	0.598214		M0201	IBM201	2	0.5	0.5	0	0.5	0.321429	0.460226
M0204	IBM204	1	0	0	0	0	0	0.67	0.67	0.190476		M0204	IBM204	2	0	0	0.2	0.2	0.114286	0.150226
M0205	IBM205	1	0	0.2	0.2	0.2	0.4	0.4	0.4	0.271429		M0205	IBM205	2	0	0	0	0	0	0.135226
M0206	IBM206	1	0.4	0.4	1	1	1	1	1	0.871429		M0206	IBM206	2	0.75	1	1	1	0.964286	0.915226
M0208	IBM208	1	0.5	0.5	0.5	0.5	0.5	1	1	0.642857		M0208	IBM208	2	0	0	1	1	0.571429	0.605226
M0209	IBM209	1	0	0	0	0	0	1	1	0.285714		M0209	IBM209	2	0.25	0.75	0.75	0.75	0.678571	0.485226
M0210	IBM210	1	0	0.25	0.25	0.5	0.5	0.75	0.75	0.455357		M0210	IBM210	2	0.2	0.4	0.4	0.4	0.371429	0.415226
M0213	IBM213	1	0	0.33	1	1	1	1	1	0.833333		M0213	IBM213	2	0	1	1	1	0.857143	0.845226
M0214	IBM214	1	0	0.25	0.25	0.5	0.6	0.6	0.6	0.426786		M0214	IBM214	2	0	0.5	0.75	0.75	0.571429	0.500226
M0215	IBM215	1	0	0	0	0	0	0.25	0.25	0.0714286		M0215	IBM215	2	0	0	0	0	0	0.0352258
M0216	IBM216	1	0	0.6	1	1	1	1	1	0.871429		M0216	IBM216	2	0	1	1	1	0.857143	0.865226
M0218	IBM218	1	0	0.33	0.67	0.67	0.67	1	1	0.67		M0218	IBM218	2	0.6	1	1	1	0.942857	0.805226
M0219	IBM219	1	0	0.2	0.2	0.2	0.4	1	1	0.442857		M0219	IBM219	2	0	0.33	0.67	0.67	0.47619	0.460226
M0220	IBM220	1	0	0	0	0.25	0.25	1	1	0.366071		M0220	IBM220	2	0	0	0	1	0.214286	0.290226
M0222	IBM222	1	0	1	1	1	1	1	1	0.928571		M0222	IBM222	2	1	1	1	1	1	0.965226
M0223	IBM223	1	0	1	1	1	1	1	1	0.928571		M0223	IBM223	2	1	1	1	1	1	0.965226
M0225	IBM225	1	0	0	0	0	0.4	1	1	0.342857		M0225	IBM225	2	0	0	0.25	0.5	0.196429	0.270226
M0228	IBM228	1	0.75	0.75	1	1	1	1	1	0.946429		M0228	IBM228	2	1	1	1	1	1	0.975226
M0229	IBM229	1	0	0.4	0.6	0.6	0.6	0.6	0.6	0.528571		M0229	IBM229	2	1	1	1	1	1	0.765226
M0230	IBM230	1	0	0	0.5	0.5	0.5	0.5	0.5	0.392857		M0230	IBM230	2	0	0.5	0.5	0.5	0.428571	0.410226
M0232	IBM232	1	0.2	0.2	0.6	0.6	0.6	0.8	1	0.592857		M0232	IBM232	2	0.4	0.6	1	1	0.8	0.695226
M0233	IBM233	1	0	0	0	0.25	0.25	0.75	0.75	0.294643		M0233	IBM233	2	0	0	0	0.33	0.0714286	0.180226
M0237	IBM237	1	0.8	0.8	1	1	1	1	1	0.957143		M0237	IBM237	2	0.6	1	1	1	0.942857	0.950226
M0238	IBM238	1	0	0	0.4	0.4	1	1	1	0.571429		M0238	IBM238	2	0	0	0.25	0.25	0.142857	0.355226
M0240	IBM240	1	0	0	0.25	0.5	0.5	1	1	0.491071		M0240	IBM240	2	0	0	1	1	0.571429	0.530226
M0241	IBM241	1	0	0.2	0.6	0.6	0.8	1	1	0.642857		M0241	IBM241	2	0.4	0.8	0.8	0.8	0.742857	0.690226
M0244	IBM244	1	0	0.5	0.67	0.67	0.67	1	1	0.690476		M0244	IBM244	2	0.33	0.75	0.75	1	0.744048	0.715226
M0246	IBM246	1	0	0	1	1	1	1	1	0.785714		M0246	IBM246	2	0	0	0.5	1	0.392857	0.590226
M0248	IBM248	1	0.5	0.5	0.5	0.5	0.5	1	1	0.642857		M0248	IBM248	2	1	1	1	1	1	0.820226
M0250	IBM250	1	1	1	1	1	1	1	1	1		M0250	IBM250	2	0.8	1	1	1	0.971429	0.985226
M0253	IBM253	1	1	1	1	1	1	1	1	1		M0253	IBM253	2	0	0.33	0.33	0.33	0.285714	0.645226
M0255	IBM255	1	1	1	1	1	1	1	1	1		M0255	IBM255	2	1	1	1	1	1	1.00023
M0256	IBM256	1	0	0.25	0.75	1	1	1	1	0.776786		M0256	IBM256	2	0.33	0.33	0.33	0.33	0.33	0.555226
M0258	IBM258	1	0.75	0.75	0.75	1	1	1	1	0.901786		M0258	IBM258	2	1	1	1	1	1	0.950226
M0262	IBM262	1	0	0	0	0.25	0.5	0.75	0.75	0.330357		M0262	IBM262	2	1	0.5	0.5	0.5	0.571429	0.450226
M0263	IBM263	1	0	0.6	0.6	0.8	0.8	1	1	0.735714		M0263	IBM263	2	0.5	0.5	0.5	0.5	0.5	0.620226
M0265	IBM265	1	0.25	0.5	0.75	0.75	0.75	0.75	1	0.705357		M0265	IBM265	2	0	1	1	1	0.857143	0.785226
M0266	IBM266	1	0	0.25	0.25	0.25	0.5	0.5	0.5	0.339286		M0266	IBM266	2	0	0	0.4	0.6	0.271429	0.305226
M0267	IBM267	1	0	0	0	0	0.4	0.8	0.8	0.285714		M0267	IBM267	2	0	0	0	0.33	0.0714286	0.180226
M0268	IBM268	1	0	0	0.5	0.75	0.75	0.75	0.75	0.544643		M0268	IBM268	2	0.5	0.5	1	1	0.785714	0.665226
M0269	IBM269	1	0	0	0	0	0.2	1	1	0.314286		M0269	IBM269	2	0	0	0.2	0.4	0.157143	0.235226
M0270	IBM270	1	0	0.33	0.67	1	1	1	1	0.77381		M0270	IBM270	2	0	1	1	1	0.857143	0.815226
M0271	IBM271	1	0	0.25	0.2	0.6	0.8	1	1	0.578571		M0271	IBM271	2	0	0	0.33	0.67	0.261905	0.420226
M0272	IBM272	1	0	0.33	0.33	0.33	1	1	1	0.595238		M0272	IBM272	2	0	0	0.33	0.67	0.261905	0.430226
M0274	IBM274	1	0.67	1	1	1	1	1	1	0.97619		M0274	IBM274	2	0.75	0.75	1	1	0.892857	0.935226
M0276	IBM276	1	0	0	0	0	0.2	0.2	0.2	0.0857143		M0276	IBM276	2	0	0	0	0	0	0.0452258
M0277	IBM277	1	0.2	0.4	0.4	0.4	0.4	0.4	0.4	0.385714		M0277	IBM277	2	0.25	0.25	0.5	0.75	0.446429	0.420226
M0278	IBM278	1	0	0	0	0	1	1	1	0.428571		M0278	IBM278	2	0	0	0	1	0.214286	0.320226
M0279	IBM279	1	0	0.5	0.5	1	1	1	1	0.767857		M0279	IBM279	2	0	0	0.25	0.5	0.196429	0.485226
M0280	IBM280	1	0	0.8	1	1	1	1	1	0.9		M0280	IBM280	2	0.4	0.6	1	1	0.8	0.850226
M0281	IBM281	1	0	0	0.33	0.33	0.33	1	1	0.452381		M0281	IBM281	2	0	0	0.33	0.33	0.190476	0.320226
M0282	IBM282	1	0.33	0.67	0.67	0.67	0.67	1	1	0.738095		M0282	IBM282	2	1	1	1	1	1	0.870226
M0283	IBM283	1	0	0.5	0.75	0.75	0.75	0.75	0.75	0.660714		M0283	IBM283	2	0	0.4	1	1	0.685714	0.675226
M0284	IBM284	1	0	0.67	1	1	1	1	1	0.880952		M0284	IBM284	2	0.25	1	1	1	0.892857	0.885226
M0285	IBM285	1	0	0	0	0	0	0	0	0		M0285	IBM285	2	0	0	0.2	0.2	0.114286	0.0552258
M0286	IBM286	1	0	0.4	0.8	1	1	1	1	0.807143		M0286	IBM286	2	0.2	0.6	0.8	0.8	0.657143	0.735226
M0287	IBM287	1	0.25	0.5	0.75	0.75	0.75	1	1	0.75		M0287	IBM287	2	0	0.4	0.4	0.6	0.385714	0.570226
M0288	IBM288	1	0	0	0	0	0.2	0.4	1	0.207143		M0288	IBM288	2	0.2	0.4	0.6	0.6	0.485714	0.350226
M0289	IBM289	1	NA	NA	NA	NA	NA	NA	NA	NA		M0289	IBM289	2	0	0	0	0.5	0.107143	0.134206
M0292	IBM292	1	0.5	0.25	0.25	0.25	0.75	0.75	0.75	0.482143		M0292	IBM292	2	1	1	1	1	1	0.740226
M0295	IBM295	1	0.6	1	1	1	1	1	1	0.971429		M0295	IBM295	2	0.75	0.75	1	1	0.892857	0.930226
M0297	IBM297	1	0.2	0.2	0.6	0.6	0.8	1	1	0.657143		M0297	IBM297	2	0.4	0.8	1	1	0.857143	0.760226
M0298	IBM298	1	0	0.75	0.75	0.75	0.75	1	1	0.767857		M0298	IBM298	2	1	1	1	1	1	0.885226
M0300	IBM300	1	0.67	0.67	0.67	0.67	0.67	1	1	0.761905		M0300	IBM300	2	0.8	0.8	0.8	0.8	0.8	0.780226
M0303	IBM303	1	0	0	0	0	0.33	1	1	0.33		M0303	IBM303	2	0	0	0	0.5	0.107143	0.220226
M0304	IBM304	1	0	0.25	0.25	0.25	0.25	0.5	0.5	0.303571		M0304	IBM304	2	0	0	0	0.25	0.0535714	0.175226
M0305	IBM305	1	0	0.33	1	1	1	1	1	0.833333		M0305	IBM305	2	0	0	0.5	0.75	0.339286	0.585226
M0307	IBM307	1	0	0	0.5	0.5	1	1	1	0.607143		M0307	IBM307	2	0.33	0.67	0.67	0.67	0.619048	0.615226
M0308	IBM308	1	0	0	0.5	0.5	1	1	1	0.607143		M0308	IBM308	2	0	1	1	1	0.857143	0.735226
M0309	IBM309	1	0	0	0	0	0	0	0.67	0.0714286		M0309	IBM309	2	0	0	0	0	0	0.0352258
M0310	IBM310	1	0	0.67	0.67	1	1	1	1	0.821429		M0310	IBM310	2	0	0	1	1	0.571429	0.695226
M0311	IBM311	1	0	0	0	0.5	0.5	0.75	0.75	0.375		M0311	IBM311	2	0	0	0.75	0.75	0.428571	0.405226
M0313	IBM313	1	0	0.2	0.2	0.2	0.2	0.4	0.8	0.285714		M0313	IBM313	2	0	0	0.33	0.67	0.261905	0.275226
M0314	IBM314	1	0.25	0.25	0.5	0.75	0.75	1	1	0.669643		M0314	IBM314	2	0.5	0.75	0.75	1	0.767857	0.720226
M0315	IBM315	1	0.5	1	1	1	1	1	1	0.964286		M0315	IBM315	2	0.25	0.25	0.25	0.75	0.357143	0.660226
M0317	IBM317	1	0	0	0	0	0.6	1	1	0.371429		M0317	IBM317	2	0	0	0.6	0.6	0.342857	0.355226
M0318	IBM318	1	0.6	0.6	0.8	0.8	1	1	1	0.842857		M0318	IBM318	2	0.8	1	1	1	0.971429	0.905226
M0321	IBM321	1	0	0	0	0	0.25	0.5	0.5	0.178571		M0321	IBM321	2	0	0	0	0	0	0.0902258
M0322	IBM322	1	0	0.5	0.5	0.5	0.5	1	1	0.607143		M0322	IBM322	2	0.33	0.33	0.33	0.33	0.33	0.470226
M0323	IBM323	1	0	0.25	0.25	0.5	0.5	0.5	0.5	0.383929		M0323	IBM323	2	0	0	0	0.33	0.0714286	0.225226
M0325	IBM325	1	0	0	0	0	0.4	1	1	0.342857		M0325	IBM325	2	0	0	0.25	0.75	0.25	0.295226
M0326	IBM326	1	0.4	0.4	0.4	0.6	0.8	0.8	1	0.628571		M0326	IBM326	2	0	0	0.75	1	0.482143	0.555226
M0327	IBM327	1	0	0	0	0	0.2	0.2	0.6	0.128571		M0327	IBM327	2	0	0	0	0.33	0.0714286	0.100226
M0328	IBM328	1	0	0	0.2	0.2	0.4	0.4	0.6	0.264286		M0328	IBM328	2	0	0	0.33	0.33	0.190476	0.225226
M0331	IBM331	1	0.25	0.25	0.25	0.25	0.25	0.25	0.25	0.25		M0331	IBM331	2	0	0	0.33	0.33	0.190476	0.220226
M0332	IBM332	1	0.25	1	1	1	1	1	1	0.946429		M0332	IBM332	2	1	1	1	1	1	0.975226
M0334	IBM334	1	0	0.33	0.33	0.67	1	1	1	0.654762		M0334	IBM334	2	NA	NA	NA	NA	NA	0.626245
M0335	IBM335	1	0	0	0	0.2	0.6	0.8	0.8	0.35		M0335	IBM335	2	0	0.5	0.5	0.5	0.428571	0.390226
M0337	IBM337	1	0.33	1	1	1	1	1	1	0.952381		M0337	IBM337	2	0.75	1	1	1	0.964286	0.955226
M0338	IBM338	1	0.4	0.6	0.8	1	1	1	1	0.864286		M0338	IBM338	2	1	1	1	1	1	0.930226
M0340	IBM340	1	0	0	0	0	0	0	0	0		M0340	IBM340	2	0	1	1	1	0.857143	0.430226
M0341	IBM341	1	0	0	1	1	1	1	1	0.785714		M0341	IBM341	2	NA	NA	NA	NA	NA	0.766245
M0342	IBM342	1	0	0	0	0	0	1	1	0.285714		M0342	IBM342	2	NA	NA	NA	NA	NA	0.266245
M0344	IBM344	1	0	0	0	0	0.5	1	1	0.357143		M0344	IBM344	2	NA	NA	NA	NA	NA	0.336245
M0345	IBM345	1	0	0	0	0	0	1	1	0.285714		M0345	IBM345	2	NA	NA	NA	NA	NA	0.266245
M0346	IBM346	1	0	0	0	0.25	0.25	0.25	0.25	0.151786		M0346	IBM346	2	0.2	0.2	0.4	0.4	0.314286	0.230226
M0347	IBM347	1	0	0.2	0.6	0.6	0.8	0.8	0.8	0.585714		M0347	IBM347	2	0.2	0.8	0.8	0.8	0.714286	0.650226
M0349	IBM349	1	0	0	0.5	0.5	0.5	1	1	0.535714		M0349	IBM349	2	NA	NA	NA	NA	NA	0.516245
M0351	IBM351	1	0	0.25	0.25	0.5	0.75	0.75	0.75	0.491071		M0351	IBM351	2	0	0.5	0.75	1	0.625	0.560226
M0352	IBM352	1	0	0	0	0	0.25	0.75	0.75	0.25		M0352	IBM352	2	0	0	0	0	0	0.125226
M0353	IBM353	1	NA	NA	NA	NA	NA	NA	NA	NA		M0353	IBM353	2	0	0	0	1	0.214286	0.234206
M0354	IBM354	1	0	0.2	0.4	0.4	0.4	0.4	0.4	0.342857		M0354	IBM354	2	0	0	0.33	0.33	0.190476	0.265226
M0355	IBM355	1	0	0	0.25	0.25	0.25	0.75	0.75	0.339286		M0355	IBM355	2	0	0	1	1	0.571429	0.455226
M0356	IBM356	1	0	0.2	0.6	0.5	0.5	0.5	0.5	0.439286		M0356	IBM356	2	0	0	0.4	0.4	0.228571	0.335226
M0357	IBM357	1	0	0	0	0	0	0.25	0.5	0.0982143		M0357	IBM357	2	0	0.33	0.33	0.67	0.357143	0.230226
M0358	IBM358	1	0.5	0.6	0.8	1	1	1	1	0.871429		M0358	IBM358	2	0.75	1	1	1	0.964286	0.915226
M0360	IBM360	1	0	0	0	0	0	0	0	0		M0360	IBM360	2	0	0	0	0.33	0.0714286	0.0352258
M0361	IBM361	1	0	0.75	0.75	0.75	0.75	1	1	0.767857		M0361	IBM361	2	0.8	1	1	1	0.971429	0.870226
M0362	IBM362	1	1	1	1	1	1	1	1	1		M0362	IBM362	2	NA	NA	NA	NA	NA	0.976245
M0364	IBM364	1	0.2	0.2	0.2	0.4	0.4	0.8	0.8	0.435714		M0364	IBM364	2	0.25	0.25	0.5	0.5	0.392857	0.415226
M0365	IBM365	1	0	0.2	0.2	0.2	0.2	0.4	0.4	0.242857		M0365	IBM365	2	0.4	0.4	0.6	1	0.6	0.420226
M0367	IBM367	1	0	0.5	0.5	1	1	1	1	0.767857		M0367	IBM367	2	1	1	1	1	1	0.885226
M0368	IBM368	1	0	0	0.67	0.67	1	1	1	0.67		M0368	IBM368	2	0.6	0.6	0.8	0.8	0.714286	0.690226
M0369	IBM369	1	0.33	0.67	1	1	1	1	1	0.904762		M0369	IBM369	2	0.6	0.6	1	1	0.828571	0.865226
M0372	IBM372	1	0	0	0	0	0	1	1	0.285714		M0372	IBM372	2	0	0	0.33	0.33	0.190476	0.240226
M0376	IBM376	1	0	0	0	0.33	0.67	0.67	0.67	0.345238		M0376	IBM376	2	0	1	1	1	0.857143	0.605226
M0378	IBM378	1	0	0	0	0	0	0.33	0.33	0.0952381		M0378	IBM378	2	0	0	0	0	0	0.0502258
M0379	IBM379	1	0	0	1	1	0.5	1	1	0.714286		M0379	IBM379	2	0	0	1	1	0.571429	0.640226
M0380	IBM380	1	0.5	0.5	0.5	0.75	0.75	0.75	0.75	0.651786		M0380	IBM380	2	0.5	1	1	1	0.928571	0.790226
M0381	IBM381	1	1	1	1	1	1	1	1	1		M0381	IBM381	2	1	1	1	1	1	1.00023
M0382	IBM382	1	0.2	0.2	0.2	0.2	0.2	0.4	0.4	0.257143		M0382	IBM382	2	0.2	0.2	0.4	0.4	0.314286	0.285226
M0383	IBM383	1	0	0.2	0.4	0.4	0.6	0.8	0.8	0.485714		M0383	IBM383	2	0.2	0.2	0.6	0.6	0.428571	0.460226
M0384	IBM384	1	0	0	0.25	0.75	1	1	1	0.607143		M0384	IBM384	2	0	0	0	0	0	0.305226

## Sheet: Table S5
Table S5 Candidate genes located in the QTL on all chromosome and gene annotations. These 11 genes were selected from among 316 predicted to be encoded in this interval. "Pos" represents the physical position of candidate gene based on the B73 V4 map.
Chr	Gene ID	Gene type	Pos(V4)	Function annotation
1	Zm00001d028582	protein_coding	39799383-39800220	CPK5 (calmodulin-domain protein kinase 5)
2	Zm00001d005998	protein_coding	194954684--194956316	Caffeoyl-CoA O-methyltransferase 1
2	Zm00001d006016	protein_coding	195298613--195299098	Multiple stress-responsive zinc-finger protein ISAP1
2	Zm00001d006042	protein_coding	196158099--196158893	Cysteine/Histidine-rich C1 domain family protein
2	Zm00001d006053	protein_coding	196582504--196584317	NAC domain containing protein 38
2	Zm00001d006056	protein_coding	196690494--196696633	L-ascorbate peroxidase 2 cytosolic
2	Zm00001d006066	protein_coding	197195556-197208536	FK506-binding protein 2-1
2	Zm00001d006101	protein_coding	198162667-198163122	Calmodulin binding protein
2	Zm00001d006136	protein_coding	199540273-199541992	Copine (Calcium-dependent phospholipid-binding protein) family
6	Zm00001d038199	protein_coding	151386730-151390994	MLO-like protein 1
6	Zm00001d038205	protein_coding	151484233-151503688	barley mlo defense gene homolog8
